# Supplementary material for: A single cell RNA sequence atlas of the early Drosophila larval eye
Source: Research Square preprint supplement (doi:10.21203/rs.3.rs-4213645/v1), 2024-04-08
Supplement: Supplementary file 1 [file 257faa27a23e45d4b4a0b425.pdf]

## **Supplemental Figure legends**

**Supplemental Figure 1. PPD and PC cluster markers.** *Obp99a* (**A**) and *CG14984* (**B**) show expression in the PPD. *CG14984* is also expressed in some AUnd cells. *CG17278* (**C**) and *cv-c* (**D**) are predominantly expressed in the PC cluster.
